# Supplementary material for: Genetic structure of the crown-of-thorns seastar in the Pacific Ocean, with focus on Guam
Source: PeerJ. 2016 May 5;4:e1970. doi: 10.7717/peerj.1970 (PMC4860296; doi:10.7717/peerj.1970)
Supplement: Table S1 — Each line corresponds to one individual. The values are given in length (bp) of the fragment. Empty spaces are missing data. [file peerj-04-1970-s003.xlsx]

## Sheet: Sheet1
	Locality	Locus
		Yukina-01		Yukina-05		Yukina-06		Yukina-08		Mak-01		Mak-03		His-01		Aya2		Maki12		AyU03
	Tipalao	164	172	128	140	178	180	234	234	174	174	168	180	198	204	104	104	160	160	224	226
	Tipalao	164	172	126	138	168	180	234	234	172	172	168	174	190	202	104	104	154	160	216	224
	Tipalao	164	172	130	132	168	182	234	234	174	174	168	180	198	204	104	104	160	160	224	226
	Tipalao	166	166	126	146	168	186	234	234	176	180	174	180	196	198	104	104	154	160	226	226
	Tipalao	164	166	132	134	180	182	234	234	180	184	160	168	190	210	102	104	158	160	224	240
	Tipalao	170	174	134	140	168	182	234	234	174	174	166	174	194	196	104	104	154	160	224	242
	Tipalao	170	170	128	138	168	174	234	234	172	172	160	160	190	202	98	102	154	154	226	232
	Tipalao	164	172	128	140	178	180	234	234	172	180	160	168	192	204	102	104	154	160	222	224
	Tipalao	166	170	134	138	170	182	234	234	180	180	166	170	190	198	104	104	154	154	222	226
	Tipalao	164	176	128	142	178	186	234	242	172	174	160	160	190	206			160	160
	Tipalao	166	174	138	138	180	182	234	234	180	180	160	166	190	196	104	104	158	160	218	222
	Tipalao	164	170	132	142	168	172	234	234	172	174	166	170	198	202	104	104	154	158	224	224
	Tipalao	164	164	134	138	170	172	230	234	172	174	160	170	196	206	104	104	154	158	224	234
	Tipalao	170	180	126	132	172	180	234	234	174	176	168	170	190	202	102	104	160	160	224	226
	Tipalao	170	170	126	142	172	180	234	234	172	172	166	166	192	206	104	104	154	154	224	224
	Tipalao	164	168	126	134	168	182	234	234	178	180	160	166	198	202	102	102	154	160	222	230
	Tipalao	166	168	138	138	168	176	234	234	172	180	160	166	202	202	104	104	154	160	224	226
	Tipalao	164	172	126	130	168	182	234	234	172	174	168	174	190	194	98	102	154	154	218	224
	Tipalao	164	174	126	126	168	174	234	234	172	174	160	174	190	190	104	104	154	154	222	228
	Tipalao	164	164	136	138	178	180	234	234	172	180	166	174	200	202	98	104	154	154	222	224
	Urunao	164	166	134	138	168	180	234	234	178	180	170	176	198	202	104	104	154	158	220	226
	Urunao	164	166	126	136	168	176	234	246	174	176	170	174	190	200	102	104	154	158	226	232
	Urunao	164	174	136	142	174	182	230	234	172	174	166	168	200	206	100	102	160	160	218	236
	Urunao	164	172	126	148	172	182	234	234	174	174	166	166	190	212	98	98	154	154	224	224
	Urunao	164	170	126	138	172	182	234	234	174	178	160	160	190	202	98	104	158	160	222	232
	Urunao	164	172	132	134	170	182	234	234	182	184	166	166	196	198	104	104	160	160	224	236
	Urunao	164	166	134	134	168	178	234	234	178	178	170	170	190	198	104	104	158	158	224	228
	Urunao	170	170	138	146	172	172	234	242	176	176	160	168	202	210	98	104	160	160	224	232
	Urunao	166	166	128	138	178	178	230	234	172	172	170	176	192	202			158	160	224	226
	Urunao	164	164	142	156	174	176	230	234	180	184	160	166	206	220	104	104	154	154	222	232
	Urunao	164	172	126	134	182	184	234	234	174	178	168	170	190	198	102	104	154	160	218	232
	Urunao	164	166	126	126	172	176	234	234	178	178	168	168	190	190	102	104	158	160	226	234
	Urunao	164	174	138	146	174	184	234	234	174	176	168	174	202	210	104	104	158	160	218	226
	Urunao	164	170	134	138	168	170	234	234	180	180	160	160	198	202	102	102	154	154	218	228
	Urunao	164	172	128	146	184	186	234	234	172	174	160	166	192	210	104	106	154	158	216	220
	Urunao	166	166	128	142	174	182	234	234	174	178	160	166	192	206	104	104	154	160	224	238
	Urunao	166	170	142	128	180	182	236	236	184	186	168	168	190	206	104	104	158	160	224	226
	Urunao	164	164	130	138	172	172	230	234	172	176	160	170	194	202	104	104	154	154	224	226
	Urunao	164	166	138	142	170	180	234	246	174	174	166	170	202	206	102	104	154	160	224	226
	Urunao	172	172	130	138	172	172	234	234	174	174	166	170	194	202	98	104	154	160	232	240
	Urunao	164	164	132	136	172	182	234	234	174	178	160	168	196	200	102	104	154	154	222	228
	Urunao	164	168	134	142	172	180	234	234	174	180	166	166	198	206	98	104	154	154	222	226
	Urunao	170	170	136	142	172	182	234	242	174	174	160	174	200	206	104	104	154	158	226	232
	Urunao	164	166	136	152	172	172	234	234	172	172	166	166	200	216	102	104	158	160	226	226
	Urunao	164	164	130	138	172	172	230	234	172	176	160	170	194	202	104	104	154	154	224	226
	Urunao	170	174	132	138	168	180	234	234	182	182	166	168	196	202	102	102	154	160	218	224
	Urunao	172	174	136	142	182	182	234	234	174	180	160	166	200	206	104	106	154	154
	Urunao	164	172	126	138	172	180	234	234	172	178	166	166	190	202	104	104	160	160	222	222
	Urunao	164	170	134	134	168	180	234	234	174	180	166	180	198	198	104	104	160	160	222	226
	Urunao	166	170	128	138	172	180	234	234	172	176	166	170	192	202	104	104	160	160	216	224
	Taguan	164	166	134	138	172	182	230	234	178	180	178	180	198	202	98	104	158	160	216	224
	Taguan	164	164	134	136	176	180	234	234	172	180	166	174	198	200	104	104	160	160	228	244
	Taguan	164	166	134	142	172	182	234	234	174	184	168	178	198	206	104	104	158	160	224	228
	Taguan	164	170	134	146	172	180	234	234	178	180	166	174	198	210	102	104	160	160	224	224
	Taguan	164	170	138	138	170	180	234	234	172	184	170	174	202	202	104	104	158	160	222	232
	Taguan	164	170	138	138	180	180	234	234	178	180	168	168	202	202	104	104	160	160	224	226
	Taguan	170	170	126	138	172	180	234	234	172	178	160	160	190	202	102	104	160	160	224	232
	Taguan	166	166	132	138	172	184	230	234	172	174	160	168	196	202	104	104	154	158	218	254
	Taguan	164	170	136	138	174	182	234	234	174	174	170	170	200	202	104	104	160	160	222	224
	Taguan	166	170	126	140	168	172	234	234	172	178	160	166	190	204	104	106	158	160	222	222
	Taguan	164	170	128	146	168	182	234	234	174	174	160	170	192	210	102	104	154	158	222	224
	Taguan	164	170	132	132	174	186	234	234	174	178	166	170	190	196	104	104	158	160	222	224
	Taguan	166	174	126	140	172	176	234	234	174	182	160	160	190	204	102	104	158	160	226	232
	Taguan	164	166	128	128	168	182	230	234	178	178	166	168	190	192	104	104	158	158	222	224
	Taguan	164	170	138	142	168	180	230	234	172	172	166	168	202	206	102	104	158	160	222	224
	Taguan	166	166	138	148	168	168	234	234	172	178	170	176	202	212	102	104	158	160
	Taguan	164	166	126	136	174	174	234	234	178	182	168	174	190	200	104	104	158	160	222	226
	Taguan	170	170	138	138	170	172	234	234	172	174	170	172	202	202	102	104	160	160	224	228
	Taguan	166	170	134	134	172	180	230	234	176	176	168	170	198	198	102	102	160	160	224	244
	Taguan	166	174	134	138	176	182	234	234	176	180	166	170	198	202	104	106	158	158
	Taguan	170	172	138	142	172	182	234	234	178	180	168	176	202	206	104	104	160	160	224	244
	Taguan	164	170	134	138	172	180	234	234	178	178	160	174	198	202	102	106	160	160	220	224
	Taguan	164	172	134	138	172	174	234	234	174	178	166	168	198	202	104	104			226	234
	Taguan	166	174	134	134	174	176	230	234	172	174	174	176	190	198	102	104	158	158	226	228
	Taguan	164	170	138	146	168	176	234	242	174	180	168	168	202	210	104	104	160	160	220	228
	Taguan	164	170	132	146	172	174	230	234	178	180	160	166	196	210	102	104	158	160
	Taguan	164	170	134	138	172	180	234	234	178	178	160	174	198	202	102	106	160	160	220	224
	Taguan	164	172	134	134	174	182	234	234	174	176	168	168	198	198	104	104
	Taguan	164	172	134	146	172	184	234	234	174	174	168	176	198	210	104	104	160	160	224	226
	Taguan	166	166	132	138	172	184	230	234	172	174	160	168	196	202	104	104	154	158	218	224
	Taguan	166	170	134	146	170	170	234	234	172	178	164	166	198	210	98	104	160	160	218	220
	Taguan	164	166	132	138	170	186	236	242	174	180	166	168	196	202	102	102	160	160	218	224
	North Haputo	170	170	136	146	176	176	234	234	172	172	166	170	200	210	104	104	154	154	224	224
	North Haputo	164	174	128	142	182	182	234	234	172	178	160	166	192	206	104	104	154	160	224	226
	North Haputo	164	166	134	136	172	174	234	234	172	180	160	166	198	200	104	104	158	160	224	232
	North Haputo	164	170	126	132	172	180	230	242	180	182	166	168	190	196	104	104	154	160	224	236
	North Haputo	166	172	134	134	168	180	230	234	174	180	166	166	198	198	104	104	154	160	218	222
	North Haputo	166	172	134	156	176	182	234	234	172	176	168	176	198	220	102	104	158	158	236	238
	North Haputo	166	172	132	138	172	174	234	234	172	178	168	170	196	202	104	104	154	158	212	222
	North Haputo	170	170	134	146	168	180	234	234	178	182	166	166	198	210	98	104	154	158	218	228
	North Haputo	164	164	132	132	172	182	234	234	172	174	160	166	190	196	104	104	154	160	224	226
	North Haputo	164	164	142	142	170	174	234	234	174	174	168	174	206	206	98	102	154	158	216	218
	North Haputo	170	172	134	138	176	180	230	234	174	174	166	166	198	202	102	102	158	160	226	234
	North Haputo	164	166	128	146	180	182	234	234	172	172	160	170	192	210	102	104	154	158	222	224
	North Haputo	164	164	136	138	178	182	234	234	174	180	160	166	190	202	104	104	154	158	224	224
	North Haputo	170	174	134	136	174	178	230	234	174	180	160	166	198	200	104	104	154	162	222	232
	North Haputo	172	172	128	138	178	182	234	234	180	184	160	166	198	202	104	104	154	154	224	226
	North Haputo	170	174	134	136	174	178	234	234	174	180	160	166	198	200	104	104	154	162	222	232
	North Haputo	166	172	132	134	172	172	234	234	172	180	160	166	196	198	104	104	154	154	224	224
	North Haputo	164	164	126	134	170	176	234	234	172	178	166	170	190	198	104	104	154	154	222	228
	North Haputo	164	164	128	136	174	176	234	234	174	178	166	166	192	200	104	104	154	160	222	240
	North Haputo	164	172	138	142	172	172	234	234	178	180	160	168	202	206	98	104	158	160	218	222
	North Haputo	166	168	138	138	182	186	234	234	172	182	166	176	202	202	104	104	154	158	216	226
	North Haputo	170	174	138	138	172	182	234	234	174	174	166	168	202	202	104	104	158	160	224	226
	North Haputo	164	172	146	146	172	182	234	234	178	178	168	178	210	210	104	104	154	154	220	230
	North Haputo	164	174	134	138	174	184	234	234	174	178	160	170	198	202	104	104	154	154	222	232
	North Haputo	164	174	134	134	170	180	230	234	174	182	166	174	198	198	102	104	160	160	224	224
	North Haputo	170	170	126	132	168	172	234	234	172	180	160	166	190	196	104	106	160	160	224	224
	North Haputo	164	166	130	138	170	176	234	234	172	174	166	170	194	202	104	104	158	160	222	224
	North Haputo	166	170	134	134	178	182	230	234	174	174	170	178	198	198	98	102	154	154	224	226
	North Haputo	164	168	138	142	168	172	234	234	176	176	166	176	202	206	104	104	160	160	216	226
	North Haputo	166	166	134	146	172	174	234	234	172	172	168	170	198	210	104	104	154	160	222	224
	Tanguisson	166	172	126	138	168	184	234	234	174	180	160	170	190	202	104	106	160	160	222	228
	Tanguisson	166	170	126	146	172	176	234	242	178	184	160	170	190	210	104	104	154	154	222	224
	Tanguisson	164	166	132	134	172	176	234	234	174	180	170	170	196	198	98	104	154	160	216	226
	Tanguisson	164	170	132	138	172	172	234	234	174	180	166	174	196	202	104	104	154	158	220	226
	Tanguisson	166	172	132	138	168	174	234	234	176	178	166	170	198	202	104	104	160	160	218	226
	Tanguisson	164	166	128	138	168	174	230	234	174	176	166	166	192	202	104	106	160	160	216	230
	Tanguisson	166	174	126	138	170	182	234	234	172	178	160	166	190	202	102	104	154	160	224	240
	Tanguisson	170	174	132	132	180	180	234	238	172	180	166	168	190	196	102	104	160	160	216	224
	Tanguisson	164	172	138	140	172	174	234	234	174	174	166	166	202	204	104	104	154	158	226	226
	Tanguisson	166	170	132	134	178	180	234	242	174	174	170	174	196	198	102	104	154	154	224	228
	Tanguisson	164	172	134	138	174	178	234	234	172	174	170	170	198	202	104	104	160	160	218	226
	Tanguisson	164	164	134	134	170	172	234	234	172	174	166	170	190	198	98	104	158	158	216	222
	Tanguisson	166	170	126	134	170	174	230	234	180	180	176	176	190	198	102	102	154	158	218	224
	Tanguisson	170	170	134	138	172	182	234	234	172	172	160	168	198	202	98	102	160	160	224	226
	Tanguisson	166	172	126	138	168	182	234	234	174	180	160	170	190	202	104	106	160	160	222	228
	Tanguisson	164	170	134	152	174	174	234	234	174	178	162	168	198	216	104	104	154	160	224	224
	Tanguisson	164	174	140	142	170	180	234	242	174	178	160	166	204	206	104	104	154	160	218	222
	Tanguisson	172	174	128	132	180	182	234	242	174	174	160	166	192	196	104	104	158	160	222	224
	Tanguisson	164	166	134	136	172	176	234	234	174	176	160	170	198	200	102	104	154	158	224	226
	Tanguisson	164	166	134	134	172	174	234	234	174	178	166	172	198	198	104	104	160	160	226	226
	Tanguisson	164	170	134	138	168	172	230	230	172	172	168	170	198	202	104	104	160	160	218	226
	Tanguisson	164	170	126	138	174	182	234	242	172	180	160	166	190	202	104	104	160	160	224	228
	Tanguisson	164	166	134	138	172	186	234	234	178	178	168	168	198	200	104	104	154	160	224	228
	Tanguisson	170	176	134	138	170	174	234	234	172	182	166	174	198	202	104	104	160	160	222	232
	Tanguisson	164	164	126	132	170	172	236	242	172	172	168	168	190	196	102	106	160	160	216	226
	Tanguisson	166	166	132	134	176	182	234	234	172	172	166	168	198	198	104	104	158	160	222	224
	Tanguisson	164	170	128	134	172	182	230	234	174	180	166	170	198	198	104	104	160	160	226	228
	Tanguisson	164	176	134	138	172	174	234	242	178	178	166	168	202	202	104	104	158	158	218	224
	Tanguisson	164	174	140	142	170	180	234	242	174	178	160	166	204	206	104	104	154	160	218	222
	Tanguisson	164	164	138	138	170	170	230	238	178	178	168	176	202	202	104	104	160	160	226	232
	Tagachan	164	174	128	128	172	176	230	234	172	178	160	168	190	192	104	104	154	158	226	234
	Tagachan	164	174	126	134	170	180	234	234	182	182	170	174	190	198	102	102	160	160	220	226
	Tagachan	164	164	132	136	172	182	234	234	172	178	168	174	196	200	104	106	160	160	224	226
	Tagachan	164	170	132	136	170	172	234	234	172	176	176	176	196	200	104	104	160	160	224	226
	Tagachan	164	170	134	146	182	182	234	234	174	182	168	168	198	210	102	104	160	160	224	224
	Tagachan	166	168	138	142	170	186	230	234	172	178	168	168	202	206	104	104	154	154	220	224
	Tagachan	164	170	128	134	170	182	234	234	172	176	166	170	192	198	104	104	160	160	218	224
	Tagachan	164	170	134	138	168	170	234	242	172	178	160	180	198	202	104	104	160	160	224	226
	Tagachan	164	168	138	138	172	182	234	238	178	178	168	170	202	202	104	104	160	160	222	222
	Tagachan	172	172	126	132	168	182	234	234	174	178	160	168	190	196	102	102	154	160	216	226
	Tagachan	170	170	134	138	168	182	234	234	172	176	168	168	198	202	104	104	160	160	224	226
	Tagachan	166	166	134	138	168	176	234	242	174	176	160	170	198	202	104	104	158	160	224	226
	Tagachan	164	166	126	138	174	182	234	242	176	176	166	168	190	202	104	106	154	160	224	232
	Tagachan	164	170	128	138	172	172	234	234	172	182	160	168	192	202	102	102	160	160	226	226
	Tagachan	166	172	138	138	182	182	234	234	172	180	160	178	202	202	104	106	158	160	228	232
	Tagachan	164	164	134	136	168	180	242	242	178	184	166	168	198	200	102	104	154	160	220	228
	Tagachan	164	170	130	142	178	180	234	234	174	178	166	174	194	206	98	104	160	162	226	228
	Tagachan	172	180	128	142	172	174	234	234	172	172	166	176	192	206	104	104	158	160	224	226
	Tagachan	164	166	136	138	172	172	234	234	180	184	168	170	200	202	102	104	158	158	224	224
	Tagachan	170	172	134	138	172	174	234	234	178	178	168	168	198	202	104	104	160	160	220	232
	Tagachan	170	172	126	126	176	182	234	234	174	176	168	174	190	190	98	102	160	160	222	228
	Tagachan	164	166	136	138	174	182	234	234	172	174	160	170	200	202	104	104	160	160	224	224
	Tagachan	166	166	138	138	180	182	234	234	174	176	160	176	202	202	102	104	158	160	224	224
	Tagachan	166	172	128	138	170	172	234	234	172	180	168	176	192	202	102	104	154	160	224	226
	Tagachan	164	166	138	138	170	172	234	234	176	186	160	166	190	202	102	104	158	160	218	218
	Tagachan	164	170	142	142	170	180	234	234	174	178	160	172	190	206	104	104	158	158	228	234
	Tagachan	166	172	134	134	172	180	234	234	176	180	160	168	198	198	104	104	160	160	226	228
	Tagachan	166	166	138	138	168	172	230	234	174	174	168	172	202	202	102	102	158	160	220	228
	Tagachan	166	170	126	132	168	172	234	234	178	180	166	166	190	196	102	102	160	160	218	228
	Tagachan	164	170	126	138	168	174	234	234	180	180	168	174	190	202	104	104	160	160	228	244
	Johnston	166	166	136	136	180	180	234	234	170	170	160	162	194	200	108	108	156	156	226	226
	Johnston	166	166	130	138	172	172	234	234	170	170	160	160	194	200	108	108	156	156	226	228
	Johnston	166	166	138	142	172	172	234	234	170	170	160	160	200	200	108	108	156	156	222	222
	Johnston	166	166	140	140	172	172	234	234	170	174	160	162	194	202	108	108	156	156	226	226
	Johnston	166	166	132	138	172	172	234	234	170	170	160	160	196	202	108	108	156	156	226	226
	Johnston	164	166	138	146	172	180	234	234	170	174	160	160	200	200	108	108	156	156	226	228
	Johnston	166	166	128	128	180	180	234	234	170	174	160	162	194	194	114	114	156	156	226	226
	Johnston	166	166	138	138	172	172	234	234	170	170	160	162	194	200	108	108	156	156	226	226
	Johnston	166	166	134	144	172	180	234	234	170	170	162	162	198	208	108	108	156	156	226	228
	Kingmanreef	170	170	134	134	176	182	234	234	174	176	168	168	198	198	104	104	160	160	222	224
	Kingmanreef	164	170	132	142	172	172	234	234	178	178	170	174	196	206	104	104	154	160	224	226
	Kingmanreef	170	174	134	134	168	176	234	242	172	180	160	174	198	198	104	104	160	160	218	222
	Kingmanreef	164	174	134	138	172	178	234	234	178	186	168	170	198	202	102	102	158	160	224	224
	Kingmanreef	170	174	134	138	180	180	234	242	172	174	160	166	198	202			160	160	222	224
	Kingmanreef	164	170	134	134	170	172	234	234	174	174	166	168	198	198	104	104	158	158	224	224
	Kingmanreef	164	170	138	138	168	180	234	234	172	178	166	166	190	202			158	160	216	248
	Kingmanreef	164	170	134	142	180	182	230	234	178	180	168	174	198	206	104	104	160	160	222	226
	Kingmanreef	164	174	138	138	168	180	234	234	178	178	160	170	190	202	102	104	160	160	218	222
	Kingmanreef	170	170	130	142	172	180	234	234	178	180	166	170	194	206	104	104	154	162	224	224
	Kingmanreef	166	172	130	142	172	172	234	234	174	174	160	166	194	206	102	104	162	162	212	224
	Kingmanreef	166	172	138	138	176	180	234	234	176	176	166	168	202	202	98	98	160	160	224	226
	Kingmanreef	170	174	138	142	176	176	234	234	172	172	170	174	202	206			160	160	222	224
	Kingmanreef	164	172	142	150	172	180	234	234	174	180	170	174	206	214			154	160	222	224
	Kingmanreef	168	170	134	134	168	172	234	234	172	172	160	170	190	198			158	160	216	224
	Kingmanreef	170	174	134	138	174	180	234	242	172	172	160	166	198	202	104	104	160	160	222	224
	Kingmanreef	164	166	134	134	172	178	242	242	178	180	174	174	190	198	102	102	158	160	218	224
	Kingmanreef	170	170	134	134	176	182	234	234	174	178	170	170	198	198	104	104	160	160	216	224
	Kingmanreef	164	170	134	142	172	178	234	234	172	174	168	174	198	206	104	104	160	160	222	226
	Kingmanreef	174	174	134	138	180	180	230	242	174	178	168	168	198	202	104	104	158	160	218	222
	Swains	170	170	136	140	168	180	234	236	172	172	164	168	200	204	104	104	160	160	224	226
	Swains	164	172	134	136	174	182	234	234	176	178	160	166	200	200	102	104	158	160	218	226
	Swains	164	172	130	130	174	182	234	234	172	180	166	170	194	198	102	104	154	158	216	216
	Swains	164	170	134	138	172	174	230	234	172	172	168	174	198	202	102	104	154	160	218	224
	Swains	164	170	130	136	172	180	234	234	172	178	170	170	194	200	104	106	160	160	224	228
	Swains	166	176	134	150	172	174	234	234	182	182	170	170	198	214	104	108	154	158	218	226
	Swains	164	164	130	130	172	172	230	234	174	178	160	166	194	194	104	104	160	160	216	218
	Swains	164	170	134	136	174	182	234	234	178	178	170	170	200	202
	Swains	164	172	134	142	172	172	234	234	182	182	162	166	200	206
	Swains	166	166	134	136	178	184	230	234	180	180	166	174	200	200
	Japan	172	172	134	138	170	180	238	238	178	180	168	168	196	202	106	106	154	160	218	218
	Japan	172	176			174	184	238	238	178	180	162	168	192	200	104	104	154	162	218	218
	Japan	166	168	128	138	174	174			176	182	168	172	192	202	106	106	162	162	228	228
	Japan	166	168	130	134	170	174	238	238	176	178	170	182	194	198	104	104	160	160	222	222
	Japan	174	174	132	152	174	176	238	238	176	178	168	178	196	216	104	104	162	162	218	218
	Japan	172	172			182	186	238	238	176	180	174	180	196	212	104	104	160	162	222	222
	Japan	166	174	138	152	178	182	232	232	176	178	168	172	202	216	106	106	160	162	218	218
	Japan	166	168			172	174	238	238	176	180	168	170	192	194	104	104	162	162	228	228
	Japan			132	132	174	174	238	238	172	172			196	196	106	106	160	160	216	216
	Japan	168	172	144	150	174	174	234	238	170	176	170	176			106	106	158	162	224	224
	Japan	166	172	132	132	170	178	234	238	178	180	168	180	196	196	106	106	160	164
	Japan	168	172	134	144	170	184	238	238	178	180	170	184	196	206	106	106	162	162	226	226
	Japan	166	166	128	128	174	174	238	238	172	172	172	172			106	106	160	160	218	218
	Japan	172	172	132	132	174	184	238	238	176	180	172	172	196	196	106	106	158	162	220	220
	Japan	172	172	132	140	170	180	238	238	176	178	170	172	196	204	102	102	160	162	220	220
	Japan	172	172	134	144	174	180	238	238	176	178	168	180			104	104	160	162	236	236
	Japan	172	172	132	138	170	174	238	238	178	182	178	180	196	202	106	106	162	162	220	220
	Japan	172	172	132	132	174	174	238	238	172	176	174	180	196	196	106	106	162	162	220	220
	GBR	168	172	134	134	182	188	234	238	176	176	168	172	198	200	104	104	158	162	232	232
	GBR	166	174	132	134	176	180	238	238	174	174	166	172	196	198	106	106	162	162	226	226
	GBR	166	172	140	140	174	184	238	238	176	180	172	172			104	104	160	160	226	226
	GBR	166	168	132	138	160	172	238	238	176	176	170	176	202	202	100	100	158	158	228	228
	GBR	168	182	130	140	182	182	238	238	170	176	162	168	196	202	106	106	154	156	228	228
	GBR	168	174	140	140	168	174	238	238	170	170	162	162	194	202	106	106	156	158	228	228
	GBR	168	174	140	144	174	174	238	238	170	170	162	170	202	206	106	106	156	162	224	224
	GBR	168	168	142	142	174	174	238	238	170	174	162	164	194	204	104	104	158	158	228	228
	GBR	170	170	132	132	180	180	238	238			170	170			104	104			230	230
	GBR	164	164	132	132	176	176	238	238	176	176	170	170	196	196	106	106			220	220
	GBR	168	172	136	146	182	184	238	238	174	176	170	170	200	210	106	106	160	162	224	224
	GBR	166	166	132	132	184	184	238	238	176	178	170	178	200	200	106	106	162	162	224	224
	GBR	168	172	134	134	174	182	238	238	176	180	168	170	198	198	106	106	160	162	220	220
	GBR					178	178	234	234	172	172	162	162	194	194	104	104	158	158	220	220
	GBR	168	174	142	142	176	176	234	238	174	180	172	174	204	216	104	104	160	162	220	220
	GBR	168	174	130	134	174	176	238	238	174	174	172	172	196	196	100	100	162	162	224	224
	GBR	166	166	126	126	174	174	234	234	174	174	162	162	190	190	104	104	158	158	226	226
	GBR	164	164	134	134			238	238	176	176	170	170	198	198	104	104	160	160	228	228
	GBR	168	172	132	138	182	182	238	238	174	176	170	180	200	200	102	102	162	162	228	228
	Vanuatu	164	164	134	134	170	170	238	238	176	176	168	168			104	104			220	220
	Vanuatu	168	174	134	140	172	182	234	242	174	182	172	172	198	202	106	106	154	162	220	220
	Vanuatu	166	172	136	138	174	184	238	238	178	178	172	174	198	200	102	102	162	162	220	220
	Vanuatu	172	172	134	140	176	184	238	238	176	182	162	168	198	202	106	106	154	158	226	226
	Vanuatu	166	166	132	136	174	184	238	238	178	178	174	180	196	198	104	104	162	162	226	226
	Vanuatu	164	164	138	138	170	170	238	238	176	176	170	170	202	202	106	106	154	154	220	220
	Vanuatu	166	166	140	146	170	176	238	238	176	178	172	172	202	210	100	100	154	162	226	226
	Vanuatu	168	178	132	140	184	184	238	238	176	178	168	168	196	202			154	160	230	230
	Vanuatu	172	174	134	136	172	174	238	238	176	180	172	176	198	198	106	106	160	162	220	220
	Vanuatu	166	166	138	138	170	170	234	234	178	178	170	170	194	194	106	106	154	154	226	226
	Vanuatu	164	164			174	174	238	238	174	174	172	172					160	160
	Moorea	170	170	130	132	178	178	240	240	180	182	172	174	194	194	108	108	154	154	220	220
	Moorea	170	172	124	124	178	178	240	240	180	180	170	172	202	202	108	108	154	154	220	220
	Moorea	170	174	124	124	178	178	240	240	172	182	170	172	194	200	102	102	154	154	220	220
	Moorea	170	174	124	124	178	178	232	240	180	180	170	178	194	198	108	108	154	154	218	218
	Moorea	166	172	134	142	172	172	238	238	180	180	172	172	198	204	106	106	154	154	224	224
	Philipines	170	170	132	132	172	172	238	238	178	178	168	168	196	196	106	106	160	160	222	222
	Philipines	168	172	132	134	182	188	238	238	170	176	168	176	196	198	106	106	162	162	226	226
	Philipines	170	170	132	132	176	176	238	238	176	176	170	170	196	196	106	106	160	160	224	224
	Philipines	172	178	130	132	182	184	238	238	176	184	174	184	194	196	104	104	162	162	220	220
	Philipines	172	174	140	142	170	172	234	238	178	184	172	172	202	206	106	106	162	162	230	230
	Philipines			132	132	170	170	238	238	178	178	168	168			106	106	158	158
	Philipines	168	172	134	134	166	174	232	238	174	176	168	170	198	198	106	106	162	162
	Philipines	166	166			170	170			176	176	176	176			106	106
	Philipines	174	174	132	132	170	186	238	238	180	180	170	188	196	196	104	104	162	162	226	226
	Philipines	172	176	134	134	170	170	238	238	180	180	168	180	198	198	106	106	158	162	228	228
	Philipines					172	172	238	238	178	178	172	172	196	196	106	106	160	160	226	226
