# Supplementary material for: Genetic structure of the crown-of-thorns seastar in the Pacific Ocean, with focus on Guam
Source: PeerJ. 2016 May 5;4:e1970. doi: 10.7717/peerj.1970 (PMC4860296; doi:10.7717/peerj.1970)
Supplement: Table S2 — N, number of individuals; Na, number of allele per locus; Ar, allelic richness; Ho, observed heterozygosity; He, expected heterozygosity; FIS, inbreeding coefficient; S.D., standard deviation. [file peerj-04-1970-s004.xlsx]

## Sheet: Sheet1
	Locality		Locus
			Yukina-01	Yukina-05	Yukina-06	Yukina-08	Mak-01	Mak-03	His-01	Aya2	Maki12	AyU03
	Tipalao, Guam	N	20	20	20	20	20	20	20	19	20	19
		Na	8	10	9	3	6	6	10	3	3	11
		Ar	5.839	7.298	6.711	1.7	4.275	5.463	7.09	2.733	2.836	6.122
		Ho	0.75	0.85	1	0.1	0.6	0.85	0.9	0.31579	0.5	0.84211
		He	0.81026	0.88077	0.86026	0.09872	0.73974	0.82564	0.86923	0.42817	0.59487	0.78805
		Fis	0.076	0.036	-0.167	-0.013	0.193	-0.03	-0.036	0.268	0.163	-0.071
		P-value	0.30452	0.71576	0.23291	1	0.11928	0.69542	0.7723	0.07264	0.60347	0.97046
		S.D.	0.0004	0.00031	0.00032	0	0.0003	0.00045	0.00043	0.00026	0.00047	0.00014
	Uruno, Guam	N	30	30	30	30	30	30	30	29	30	29
		Na	6	12	10	5	8	7	12	5	3	12
		Ar	4.715	7.596	6.793	2.995	5.959	5.091	7.549	3.461	2.972	7.058
		Ho	0.7	0.9	0.76667	0.3	0.63333	0.66667	0.93333	0.44828	0.5	0.89655
		He	0.74859	0.8887	0.84802	0.32825	0.82542	0.78983	0.88701	0.53176	0.65028	0.86267
		Fis	0.066	-0.013	0.097	0.087	0.236	0.158	-0.053	0.159	0.234	-0.04
		P-value	0.49188	0.21335	0.0118	0.17138	0.01458	0.53262	0.54421	0.2396	0.13282	0.83758
		S.D.	0.00048	0.00051	0.0001	0.00034	0.00013	0.00052	0.00037	0.00043	0.00034	0.00021
	Taguan, Guam	N	32	32	32	32	32	32	32	32	30	28
		Na	5	10	9	4	7	10	10	4	3	11
		Ar	4.155	6.401	6.885	2.49	5.282	6.327	6.395	3.016	2.554	6.868
		Ho	0.8125	0.75	0.875	0.3125	0.75	0.8125	0.84375	0.46875	0.43333	0.92857
		He	0.73909	0.82341	0.86806	0.30208	0.80208	0.84623	0.82688	0.49653	0.50452	0.83766
		Fis	-0.101	0.09	-0.008	-0.035	0.066	0.04	-0.021	0.057	0.143	-0.111
		P-value	0.05301	0.16166	0.25739	0.08084	0.50669	0.74397	0.68233	0.69591	0.09101	0.88973
		S.D.	0.00023	0.00024	0.00034	0.00022	0.00041	0.00047	0.00039	0.00046	0.00027	0.00029
	North Haputo , Guam	N	30	30	30	30	30	30	30	30	30	30
		Na	6	10	10	3	7	7	10	4	4	14
		Ar	5.086	6.842	7.06	2.046	5.315	5.155	6.8	2.76	3.391	6.975
		Ho	0.66667	0.73333	0.86667	0.2	0.7	0.86667	0.76667	0.26667	0.63333	0.83333
		He	0.79492	0.85876	0.87627	0.21299	0.80452	0.75876	0.85311	0.34746	0.66497	0.83616
		Fis	0.164	0.148	0.011	0.062	0.132	-0.145	0.103	0.236	0.048	0.003
		P-value	0.1077	0.30793	0.18056	0.11185	0.4589	0.43004	0.14156	0.06757	0.79138	0.01138
		S.D.	0.00034	0.0004	0.00037	0.00032	0.00051	0.00046	0.0003	0.00024	0.00038	9e-05
	Tanguisson, Guam	N	30	30	30	30	30	30	30	30	30	30
		Na	6	10	10	5	7	8	10	4	3	10
		Ar	4.935	6.004	6.843	3.36	4.913	5.464	5.998	3.12	2.932	6.436
		Ho	0.83333	0.86667	0.86667	0.43333	0.63333	0.76667	0.83333	0.36667	0.4	0.9
		He	0.77797	0.81921	0.86723	0.46497	0.78588	0.8096	0.81356	0.41977	0.56723	0.85028
		Fis	-0.072	-0.059	0.001	0.069	0.197	0.054	-0.025	0.128	0.298	-0.06
		P-value	0.98047	0.51196	0.78801	0.11498	0.08078	0.33532	0.37962	0.3708	0.02286	0.82852
		S.D.	0.00015	0.00028	0.00047	0.00029	0.0003	0.00037	0.00038	0.00049	0.00014	0.00032
	Tagachan, Guam	N	30	30	30	30	30	30	30	30	30	30
		Na	7	9	9	4	8	9	9	4	4	10
		Ar	4.931	6.249	6.352	2.539	6.028	6.051	6.186	2.967	3.056	6.318
		Ho	0.76667	0.7	0.86667	0.23333	0.76667	0.8	0.8	0.36667	0.4	0.76667
		He	0.78305	0.8209	0.84915	0.27232	0.8452	0.81412	0.82373	0.52373	0.49379	0.82881
		Fis	0.021	0.149	-0.021	0.145	0.094	0.018	0.029	0.303	0.193	0.076
		P-value	0.10578	0.12575	0.98602	0.34325	0.3757	0.92569	0.60503	0.1179	0.45154	0.06391
		S.D.	0.00026	0.00024	0.00014	0.00047	0.00057	0.00025	0.00046	0.00034	0.00049	0.00022
	Johnston Atoll	N	9	9	9	9	9	9	9	9	9	9
		Na	2	10	2	1	2	2	6	2	1	3
		Ar	1.778	8.549	2	1	1.995	2	5.294	1.961	1	2.956
		Ho	0.11111	0.55556	0.22222	*	0.33333	0.44444	0.66667	0	*	0.33333
		He	0.11111	0.88235	0.47059	*	0.29412	0.47059	0.75817	0.20915	*	0.46405
		Fis	0	0.385	0.543	NA	-0.143	0.059	0.127	1	NA	0.294
		P-value	1	0.05725	0.16715	NA	1	1	0.1608	0.05929	NA	0.10352
		S.D.	0	0.00024	0.00038	NA	0	0	0.00036	0.00024	NA	0.00027
	Kingmanreef	N	20	20	20	20	20	20	20	15	20	20
		Na	6	6	8	3	6	5	7	3	4	7
		Ar	4.792	4.245	5.943	2.523	4.971	4.877	5.073	2.711	3.438	5.103
		Ho	0.8	0.55	0.75	0.25	0.6	0.75	0.75	0.13333	0.4	0.85
		He	0.75641	0.70513	0.82436	0.34359	0.79744	0.81667	0.7641	0.43218	0.51538	0.74872
		Fis	-0.059	0.224	0.092	0.278	0.252	0.084	0.019	0.699	0.228	-0.139
		P-value	0.23776	0.03378	0.38399	0.14698	0.20145	0.48826	0.34004	0.0032	0.05188	0.57777
		S.D.	0.00036	0.0002	0.00034	0.00035	0.00034	0.00051	0.00033	6e-05	0.00022	0.00052
	Swains	N	10	10	10	10	10	10	10	7	7	7
		Na	5	7	7	3	6	7	7	4	3	5
		Ar	4.665	5.799	6.003	2.682	5.379	6.163	6	4	3	5
		Ho	0.7	0.8	0.8	0.4	0.4	0.7	0.7	0.71429	0.57143	0.85714
		He	0.76842	0.81579	0.81579	0.35263	0.82105	0.82105	0.8	0.57143	0.62637	0.83516
		Fis	0.094	0.02	0.02	-0.143	0.526	0.154	0.131	-0.277	0.094	-0.029
		P-value	0.06315	0.18925	0.06192	1	0.00907	0.05068	0.68318	1	0.51514	0.79028
		S.D.	0.00024	0.00042	0.0002	0	9e-05	0.00017	0.00033	0	0.00047	0.00042
	Japan	N	17	15	18	17	18	17	15	18	18	17
		Na	5	9	9	3	6	10	10	3	5	8
		Ar	4.151	6.715	5.964	2.323	4.928	6.841	6.577	2.633	3.655	6.428
		Ho	0.47059	0.66667	0.72222	0.11765	0.88889	0.82353	0.73333	0	0.5	0
		He	0.66667	0.82989	0.74762	0.22103	0.79048	0.85918	0.76552	0.52698	0.62063	0.84135
		Fis	0.301	0.202	0.035	0.475	-0.129	0.043	0.043	1	0.199	1
		P-value	0.0205	0.03155	0.32532	0.06096	0.05064	0.42437	0.39401	0	0.4828	0
		S.D.	0.00013	0.00015	0.00043	0.00022	0.00018	0.0004	0.0003	0	0.00045	0
	GBR	N	18	18	18	19	18	19	17	19	17	19
		Na	7	10	10	2	6	10	10	4	5	6
		Ar	5.737	6.888	6.788	1.951	4.766	5.935	7.311	3.463	4.205	5.135
		Ho	0.66667	0.38889	0.44444	0.10526	0.44444	0.52632	0.47059	0	0.41176	0
		He	0.81905	0.86032	0.85556	0.27312	0.75397	0.8037	0.8877	0.64865	0.73797	0.80228
		Fis	0.19	0.555	0.488	0.621	0.418	0.351	0.478	1	0.45	1
		P-value	0.00265	0	0.00144	0.03395	0.02936	0.02269	0.00059	0	0.00385	0
		S.D.	5e-05	0	3e-05	0.00018	0.00014	8e-05	2e-05	0	6e-05	0
	Valuatu	N	11	10	11	11	11	11	9	9	10	10
		Na	6	6	6	3	5	7	6	4	4	3
		Ar	5.384	5.6	5.39	2.6	4.479	5.776	5.477	3.921	3.697	2.921
		Ho	0.36364	0.7	0.54545	0.09091	0.45455	0.36364	0.66667	0	0.5	0
		He	0.80952	0.84211	0.81385	0.32468	0.74026	0.80519	0.79085	0.65359	0.71053	0.61053
		Fis	0.563	0.176	0.341	0.73	0.398	0.56	0.165	1	0.308	1
		P-value	0.00029	0.18688	0.02662	0.00796	0.05811	0.00052	0.62023	0.00012	0.53952	0.0001
		S.D.	1e-05	0.00033	0.00016	9e-05	0.00025	2e-05	0.00043	1e-05	0.00052	1e-05
	Moorea	N	5	5	5	5	5	5	5	5	5	5
		Na	4	5	2	3	3	4	5	3	1	3
		Ho	0.8	0.4	0	0.2	0.4	0.8	0.6	0	*	0
		He	0.73333	0.66667	0.35556	0.51111	0.51111	0.71111	0.82222	0.62222	*	0.62222
		Fis	-0.1034	0.4286	1	0.6364	0.2381	-0.1429	0.2941	1	NA	1
		P-value	0.74901	0.04516	0.11104	0.11099	0.33343	1	0.33801	0.01612	NA	0.01535
		S.D.	0.00043	0.00018	0.00033	0.00034	0.00046	0	0.00048	0.00012	NA	0.00012
	Phillipines	N	9	9	11	10	11	11	9	11	10	8
		Na	7	5	9	3	6	8	5	2	3	6
		Ar	6.472	4.333	6.937	2.4	5.142	6.49	4.333	1.99	2.982	5.958
		Ho	0.55556	0.33333	0.45455	0.2	0.36364	0.45455	0.33333	0	0.1	0
		He	0.86275	0.64052	0.82684	0.19474	0.78788	0.84416	0.64052	0.31169	0.61579	0.83333
		Fis	0.37	0.495	0.462	-0.029	0.551	0.474	0.495	1	0.845	1
		P-value	0.00872	0.02758	0.00147	1	0.00136	0.00579	0.02821	0.00752	0.00071	0
		S.D.	7e-05	0.00015	2e-05	0	3e-05	7e-05	0.00014	9e-05	3e-05	0
